# Supplementary material for: Sustained human outbreak of a new MPXV clade I lineage in eastern Democratic Republic of the Congo
Source: PubMed Central journal article supplement (PMC11485229; doi:10.1038/s41591-024-03130-3), 2024-06-13
Supplement: 41591_2024_3130_MOESM1_ESM.pdf [file 41591_2024_3130_MOESM1_ESM.pdf]

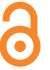

---

# **Sustained human outbreak of a new MPXV clade I lineage in eastern Democratic Republic of the Congo**

---

In the format provided by the authors and unedited

---

## **Supplemental Table 1 | Clinical and demographic characteristics of mpox suspected and confirmed cases**

| <b>Characteristic</b>                                     | <b>Suspected cases<br/>n = 241</b> | <b>Confirmed cases<br/>n = 108</b> |
|-----------------------------------------------------------|------------------------------------|------------------------------------|
| <b>Health zone where the diagnosis was made – no. (%)</b> |                                    |                                    |
| Kamituga                                                  | 224 (93%)                          | 103 (95%)                          |
| Other                                                     | 17 (7.1%)                          | 5 (4.6%)                           |
| <b>Age (years) – median (IQR)</b>                         |                                    |                                    |
|                                                           | 21 (18, 28)                        | 22 (18, 27)                        |
| <b>Sex – no. (%)</b>                                      |                                    |                                    |
| Female                                                    | 128 (54%)                          | 56 (52%)                           |
| Male                                                      | 111 (46%)                          | 52 (48%)                           |
| Unknown                                                   | 2                                  | 0                                  |
| <b>Professional sex worker – no. (%)</b>                  |                                    |                                    |
|                                                           | 71 (29.5%)                         | 31 (28.7% )                        |
| <b>Smallpox vaccinated – no. (%)</b>                      |                                    |                                    |
| No                                                        | 239 (100%)                         | 108 (100%)                         |
| Unknown                                                   | 2                                  | 0                                  |
| <b>Nationality – no. (%)</b>                              |                                    |                                    |
| Congolese                                                 | 217 (99%)                          | 92 (99%)                           |
| Rwandese                                                  | 1 (0.5%)                           | 1 (1.1%)                           |
| Burundese                                                 | 2 (0.9%)                           | 0 (0%)                             |
| Unknown                                                   | 21                                 | 15                                 |
| <b>Hospitalized – no. (%)</b>                             |                                    |                                    |
| Yes                                                       | 217 (91%)                          | 104 (96%)                          |
| No                                                        | 22 (9.2%)                          | 4 (3.7%)                           |
| Unknown                                                   | 2                                  |                                    |
| <b>Bedridden – no. (%)</b>                                |                                    |                                    |
| Yes                                                       | 9 (3.8%)                           | 10 (9.3%)                          |
| No                                                        | 224 (95%)                          | 98 (91%)                           |
| Unknown                                                   | 3                                  | 0                                  |
| <b>Fever at presentation – no. (%)</b>                    |                                    |                                    |
| Yes                                                       | 148 (62%)                          | 64 (59%)                           |
| No                                                        | 91 (38%)                           | 44 (41%)                           |
| Unknown                                                   | 2                                  | 0 (0%)                             |
| <b>Skin rash at presentation – no. (%)</b>                |                                    |                                    |
| Yes                                                       | 239 (100%)                         | 108 (100%)                         |
| No                                                        | 0 (0%)                             | 0 (0%)                             |
| Unknown                                                   | 0                                  | 0                                  |

|                                          |           |           |
|------------------------------------------|-----------|-----------|
| Cough at presentation – no. (%)          |           |           |
| Yes                                      | 41 (18%)  | 20 (19%)  |
| No                                       | 191 (82%) | 85 (81%)  |
| Unknown                                  | 9         | 3         |
| Adenopathy at presentation – no. (%)     |           |           |
| Yes                                      | 99 (42%)  | 45 (42%)  |
| No                                       | 138 (58%) | 62 (58%)  |
| Unknown                                  | 4         | 1         |
| Throat ache at presentation – no. (%)    |           |           |
| Yes                                      | 57 (24%)  | 29 (27%)  |
| No                                       | 180 (76%) | 78 (73%)  |
| Unknown                                  | 4         | 1         |
| Oral ulcers at presentation – no. (%)    |           |           |
| Yes                                      | 24 (10%)  | 13 (12%)  |
| No                                       | 213 (90%) | 94 (88%)  |
| Unknown                                  | 4         | 1         |
| Headache at presentation – no. (%)       |           |           |
| Yes                                      | 43 (18%)  | 19 (18%)  |
| No                                       | 194 (82%) | 88 (82%)  |
| Unknown                                  | 4         | 1         |
| Myalgia at presentation – no. (%)        |           |           |
| Yes                                      | 41 (17%)  | 20 (19%)  |
| No                                       | 196 (83%) | 87 (81%)  |
| Unknown                                  | 4         | 1         |
| Fatigue at presentation – no. (%)        |           |           |
| Yes                                      | 30 (13%)  | 19 (18%)  |
| No                                       | 207 (87%) | 88 (82%)  |
| Unknown                                  | 4         | 1         |
| Conjunctivitis at presentation – no. (%) |           |           |
| Yes                                      | 9 (3.8%)  | 8 (7.4%)  |
| No                                       | 229 (96%) | 100 (93%) |
| Unknown                                  | 3         | 0         |

**Supplemental Table 2** | Previously published MPXV genomes used in this study with NCBI Genbank accession number (Accession), country of origin (Country), top level administration region (Admin 1), date of sample collection to highest known precision (Date), reference for the genome sequence (Genome Reference), and reference for case description were available (Case Reference).

| Accession | Country  | Admin 1      | Date       | Genome Reference                      | Case Reference                        |
|-----------|----------|--------------|------------|---------------------------------------|---------------------------------------|
| KJ642618  | Cameroon | Centre       | 1989-12-11 | <a href="#">Nakazawa et al. 2015</a>  | <a href="#">Tchokoteu et al. 1991</a> |
| KJ642613  | DRC      | Equateur     | 1970-09-01 | <a href="#">Nakazawa et al. 2015</a>  | <a href="#">Ladnyj et al. 1972</a>    |
| DQ011155  | DRC      | Sankuru      | 1978-11-09 | <a href="#">Likos et al. 2005</a>     | <a href="#">Breman et al. 1980</a>    |
| NC_003310 | DRC      | Sankuru      | 1996       | <a href="#">Senkevich et al. 2021</a> | <a href="#">Mukinda et al. 1997</a>   |
| DQ011154  | Congo    | Likouala     | 2003-06-09 | <a href="#">Likos et al. 2005</a>     | <a href="#">Likos et al. 2005</a>     |
| KJ642612  | DRC      | Mongala      | 1986       | <a href="#">Nakazawa et al. 2015</a>  | <a href="#">Jezek et al. 1987</a>     |
| KC257460  | DRC      | Mongala      | 1985       | <a href="#">Nakazawa et al. 2015</a>  | <a href="#">Jezek et al. 1987</a>     |
| KJ642619  | Gabon    | Moyen-Ogooue | 1987-06    | <a href="#">Nakazawa et al. 2015</a>  | <a href="#">Müller et al. 1988</a>    |
| JX878417  | DRC      | Sankuru      | 2006-12-14 | <a href="#">Kugelman et al. 2014</a>  | <a href="#">Kugelman et al. 2014</a>  |
| JX878408  | DRC      | Sankuru      | 2006-10-31 | <a href="#">Kugelman et al. 2014</a>  | <a href="#">Kugelman et al. 2014</a>  |
| JX878423  | DRC      | Sankuru      | 2007-03-25 | <a href="#">Kugelman et al. 2014</a>  | <a href="#">Kugelman et al. 2014</a>  |
| JX878424  | DRC      | Sankuru      | 2007-03-25 | <a href="#">Kugelman et al. 2014</a>  | <a href="#">Kugelman et al. 2014</a>  |
| JX878426  | DRC      | Sankuru      | 2007-05-27 | <a href="#">Kugelman et al. 2014</a>  | <a href="#">Kugelman et al. 2014</a>  |
| JX878413  | DRC      | Sankuru      | 2006-12-14 | <a href="#">Kugelman et al. 2014</a>  | <a href="#">Kugelman et al. 2014</a>  |
| JX878414  | DRC      | Sankuru      | 2006-12-14 | <a href="#">Kugelman et al. 2014</a>  | <a href="#">Kugelman et al. 2014</a>  |
| JX878415  | DRC      | Sankuru      | 2006-12-26 | <a href="#">Kugelman et al. 2014</a>  | <a href="#">Kugelman et al. 2014</a>  |
| JX878416  | DRC      | Sankuru      | 2006-12-26 | <a href="#">Kugelman et al. 2014</a>  | <a href="#">Kugelman et al. 2014</a>  |
| JX878421  | DRC      | Sankuru      | 2007-03-22 | <a href="#">Kugelman et al. 2014</a>  | <a href="#">Kugelman et al. 2014</a>  |
| JX878422  | DRC      | Sankuru      | 2007-03-20 | <a href="#">Kugelman et al. 2014</a>  | <a href="#">Kugelman et al. 2014</a>  |

|          |     |         |            |                             |                                |
|----------|-----|---------|------------|-----------------------------|--------------------------------|
| JX878425 | DRC | Sankuru | 2007-04-20 | Kugelman et al. 2014        | Kugelman et al. 2014           |
| JX878427 | DRC | Sankuru | 2007-05-25 | Kugelman et al. 2014        | Kugelman et al. 2014           |
| JX878428 | DRC | Sankuru | 2007-06-30 | Kugelman et al. 2014        | Kugelman et al. 2014           |
| JX878429 | DRC | Sankuru | 2007-09-04 | Kugelman et al. 2014        | Kugelman et al. 2014           |
| JX878418 | DRC | Sankuru | 2007-01-02 | Kugelman et al. 2014        | Kugelman et al. 2014           |
| JX878419 | DRC | Sankuru | 2007-12-10 | Kugelman et al. 2014        | Kugelman et al. 2014           |
| JX878420 | DRC | Sankuru | 2007-02-26 | Kugelman et al. 2014        | Kugelman et al. 2014           |
| JX878407 | DRC | Sankuru | 2006-10-09 | Kugelman et al. 2014        | Kugelman et al. 2014           |
| JX878409 | DRC | Sankuru | 2006-11-09 | Kugelman et al. 2014        | Kugelman et al. 2014           |
| JX878410 | DRC | Sankuru | 2006-11-24 | Kugelman et al. 2014        | Kugelman et al. 2014           |
| JX878411 | DRC | Sankuru | 2006-11-30 | Kugelman et al. 2014        | Kugelman et al. 2014           |
| JX878412 | DRC | Sankuru | 2006-11-30 | Kugelman et al. 2014        | Kugelman et al. 2014           |
| MT724770 | DRC | Tshopo  | 2014       | Mariën et al. 2021          | Mariën et al. 2021             |
| MT724772 | DRC | Tshopo  | 2014       | Mariën et al. 2021          | Mariën et al. 2021             |
| KP849469 | DRC | Tshuapa | 2008       | <u>Nakazawa et al. 2015</u> |                                |
| KP849471 | DRC | Yambuku | 1985-07    | <u>Nakazawa et al. 2015</u> | <u>Khodakevich et al. 1986</u> |

**Supplemental Table 3** | NCBI Genbank accession number (Accession) for sequences generated during this study

| Accession | Isolate     | Clade | Country | Province   | Health zone | Collection date |
|-----------|-------------|-------|---------|------------|-------------|-----------------|
| PP601182  | 23MPX1740C  | Ia    | DRC     | Sud-Ubangi | Tandala     | November 2023   |
| PP601183  | 23MPX1766C  | Ia    | DRC     | Sud-Ubangi | Bokonzi     | November 2023   |
| PP601184  | 23MPX1769C  | Ia    | DRC     | Sud-Ubangi | Bokonzi     | November 2023   |
| PP601185  | 23MPX1786C  | Ia    | DRC     | Sud-Ubangi | Tandala     | December 2023   |
| PP601186  | 23MPX1793V  | Ia    | DRC     | Sud-Ubangi | Bangabola   | December 2023   |
| PP601187  | 23MPX1806V  | Ia    | DRC     | Kinshasa   | Kintambo    | December 2023   |
| PP601188  | 24MPX0008V  | Ia    | DRC     | Sud-Ubangi | Bangabola   | December 2023   |
| PP601189  | 24MPX0009C  | Ia    | DRC     | Sud-Ubangi | Bulu        | December 2023   |
| PP601190  | 24MPX0012C  | Ia    | DRC     | Sud-Ubangi | Bulu        | December 2023   |
| PP601191  | 24MPX0014C  | Ia    | DRC     | Sud-Ubangi | Bulu        | December 2023   |
| PP601192  | 24MPX0018V  | Ia    | DRC     | Tshopo     | Yahuma      | January 2024    |
| PP601193  | 24MPX0024C  | Ia    | DRC     | Tshopo     | Yahuma      | December 2023   |
| PP601194  | 24MPX0025V  | Ia    | DRC     | Tshopo     | Yahuma      | December 2023   |
| PP601195  | 24MPX0026V  | Ia    | DRC     | Tshopo     | Yahuma      | December 2023   |
| PP601196  | 24MPX0037V  | Ia    | DRC     | Sud-Ubangi | Bulu        | January 2024    |
| PP601197  | 24MPX0038V  | Ia    | DRC     | Sud-Ubangi | Bulu        | January 2024    |
| PP601198  | 24MPX0041V  | Ia    | DRC     | Sud-Ubangi | Bulu        | January 2024    |
| PP601199  | 24MPX0164V  | Ia    | DRC     | Tshopo     | Basoko      | January 2024    |
| PP601200  | 24MPX0166C  | Ia    | DRC     | Tshopo     | Basoko      | January 2024    |
| PP601201  | 24MPX0168V  | Ia    | DRC     | Tshopo     | Yakusu      | January 2024    |
| PP601202  | 24MPX0169C  | Ia    | DRC     | Tshopo     | Yakusu      | January 2024    |
| PP601203  | 24MPX0174C  | Ia    | DRC     | Tshopo     | Yakusu      | January 2024    |
| PP601204  | 24MPX0175V  | Ia    | DRC     | Tshopo     | Yakusu      | January 2024    |
| PP601205  | 24MPX0188V  | Ia    | DRC     | Equateur   | Lotumbe     | January 2024    |
| PP601206  | 24MPX0194V  | Ia    | DRC     | Equateur   | Wangata     | January 2024    |
| PP601207  | 24MPX0198V  | Ib    | DRC     | Sud-Kivu   | Kamituga    | January 2024    |
| PP601208  | 24MPX0201V  | Ib    | DRC     | Sud-Kivu   | Kamituga    | January 2024    |
| PP601209  | 24MPX0203V  | Ib    | DRC     | Sud-Kivu   | Kamituga    | January 2024    |
| PP601210  | 24MPX0205V  | Ib    | DRC     | Sud-Kivu   | Kamituga    | January 2024    |
| PP601211  | 24MPX0206V  | Ib    | DRC     | Sud-Kivu   | Kamituga    | January 2024    |
| PP601212  | 24MPX0207Or | Ib    | DRC     | Sud-Kivu   | Kamituga    | January 2024    |
| PP601213  | 24MPX0209V  | Ib    | DRC     | Sud-Kivu   | Kamituga    | January 2024    |

|          |                          |    |     |          |          |               |
|----------|--------------------------|----|-----|----------|----------|---------------|
| PP601214 | 24MPX0214V               | Ib | DRC | Sud-Kivu | Kamituga | January 2024  |
| PP601215 | 24MPX0217V               | Ib | DRC | Sud-Kivu | Kamituga | January 2024  |
| PP601216 | 24MPX0220V               | Ib | DRC | Sud-Kivu | Kamituga | January 2024  |
| PP601217 | 24MPX0221V               | Ib | DRC | Sud-Kivu | Kamituga | January 2024  |
| PP601218 | 24MPX0223C               | Ib | DRC | Sud-Kivu | Kamituga | December 2023 |
| PP601219 | 24MPX0224C               | Ib | DRC | Sud-Kivu | Kamituga | December 2023 |
| PP601220 | 24MPX0226V               | Ib | DRC | Sud-Kivu | Kamituga | December 2023 |
| PP601221 | 24MPX0228V               | Ib | DRC | Sud-Kivu | Kamituga | December 2023 |
| PP601222 | 24MPX0230C               | Ib | DRC | Sud-Kivu | Kamituga | December 2023 |
| PP601223 | 24MPX0231V               | Ib | DRC | Sud-Kivu | Kamituga | December 2023 |
| PP601224 | 24MPX0239V               | Ib | DRC | Sud-Kivu | Kamituga | January 2024  |
| PP601225 | 24MPX0240V               | Ib | DRC | Sud-Kivu | Kamituga | January 2024  |
| PP601226 | 24MPX0242V               | Ib | DRC | Sud-Kivu | Kamituga | January 2024  |
| PP601227 | RDC-NKV-GOM-<br>MPOX-004 | Ib | DRC | Sud-Kivu | Kamituga | October 2023  |
| PP601228 | RDC-NKV-GOM-<br>MPOX-010 | Ib | DRC | Sud-Kivu | Kamituga | October 2023  |

## **Supplemental Table 4 | Reconstructed Mutations in Outbreak**

### **Genoms**

| Genomes                                                | Nucleotide | Gene          | Amino Acid | APOBEC3 |
|--------------------------------------------------------|------------|---------------|------------|---------|
| 242V, 0207Or                                           | C4025T     |               |            | TC->TT  |
| 242V, 0198V, 0239V, 0220V, 0217V, 206V, 0207Or, 0205V  | C13862T    | OPG025        | E528K      | TC->TT  |
| 0240V                                                  | G57493A    | MPXVgp0<br>59 | S28L       | GA->AA  |
| 0230C                                                  | G89161A    |               |            | GA->AA  |
| 0240V, 0231V, 0230C, 0228V, 0224C, 0221V, 0209V, 0201V | G115644A   |               |            | GA->AA  |
| 0230C                                                  | A127779C   | OPG145        | K464E      |         |
| All but October                                        | C168528A   |               |            |         |
| 0226V, 0223C                                           | A170739G   | OPG193        | T249A      |         |
| 0221V                                                  | G186202A   |               |            |         |

1 Genomes that share this mutation

2 Nucleotide position in genome

3 Gene for non-synonymous mutations

4 Amino acid residue mutation

5 APOBEC3 context (not APOBEC3 if missing)



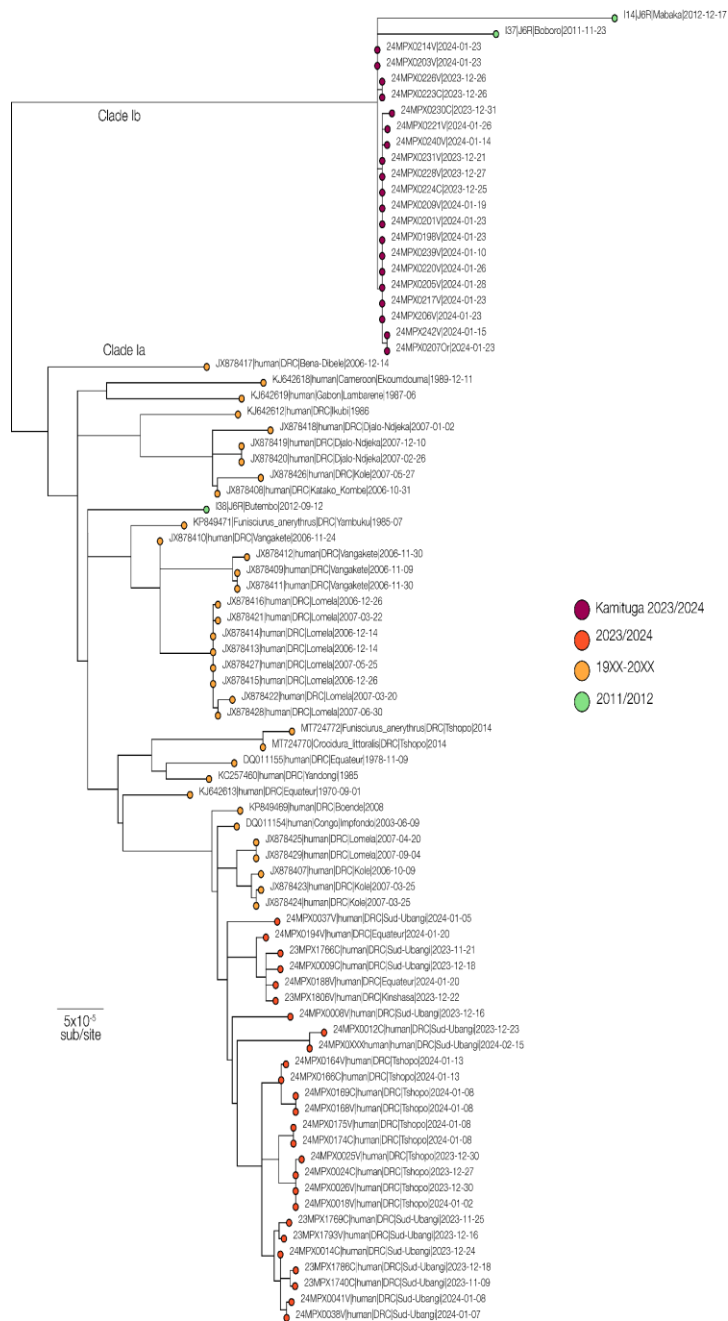

**Supplemental Figure 1** | We estimated a labeled maximum likelihood phylogeny using IQTREE2, including all high quality MPXV Clade I genome sequences available on Genbank. We also include a set of sequences constructed from fragments sequenced from an outbreak in Sud-Kivu and Nord-Kivu, reported in 2011/2012 (McCullum et al 2015, doi: 10.4269/ajtmh.15-0095). These fragments represent only a small portion of the genome (five genes); the samples' exact positions on the phylogeny cannot be reliably

reconstructed. With the available data, however, we can assert that two of the samples cluster with the recent MPXV sequences from Sud-Kivu (proposed Clade Ib), and, although divergent from the current outbreak, they likely represent some of the reservoir diversity present in the area surrounding the Kivu provinces (I14 and I37). The third sequenced sample from the 2011/2012 outbreak (I38) does not cluster with this diversity and lies in the distinct Clade Ia.

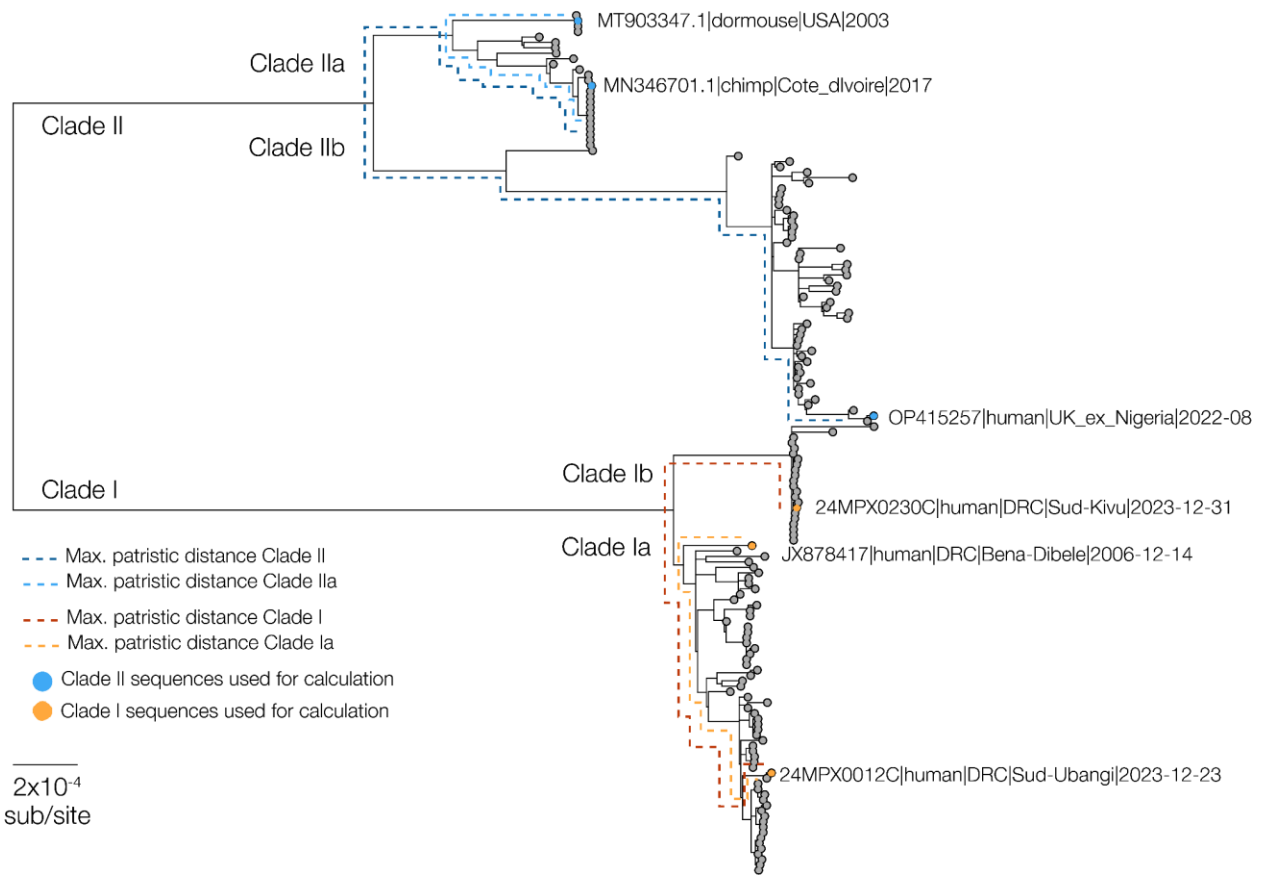

**Supplemental Figure 2** | MPXV clades are indicated, including proposed Clade Ib, in the maximum likelihood phylogeny used to calculate maximum patristic distance and the increase in that with the addition of Clade IIb to Clade II and Clade IIb to Clade I. The sequences algorithmically identified for the calculation are indicated, and the backbone used for the pairwise calculations are marked with a dashed line.
